# Supplementary material
Source: publisher figshare collection journal article supplement (https://sage.figshare.com/ndownloader/files/14909393)
Supplement: Supplementary file 1 [file 14909393]

**Supplemental Table 1.** Toxicokinetic parameters of DMIP in male and female dogs (Experiment 1)

|  |  | DMIP (mg/kg/day) | | | | | |
| --- | --- | --- | --- | --- | --- | --- | --- |
| Parameter | Sex | 250 | | 500 | | 1000 | |
|  |  | Day 1 | Day 14 | Day 1 | Day 14 | Day 1 | Day 14 |
| Cmax  (μg/mL) | M  F | 24.0  46.2 | 29.9  81.0 | 56.5  49.3 | 71.8  86.0 | 66.7  47.0 | 109  66.8 |
| Tmax  (h) | M  F | 2.0  2.0 | 2.0  2.0 | 1.0  4.0 | 1.0  2.0 | 2.0  2.0 | 2.0  2.0 |
| AUC0-24h  (μg ∙h/mL) | M  F | 162  290 | 185  392 | 265  402 | 438  478 | 507  339 | 696  518 |

n=1 in each group. M, male; F, female
